# Supplementary material for: Analysis of the circular RNA transcriptome in endometrial cancer
Source: PubMed Central journal article supplement (PMC5814174; doi:10.18632/oncotarget.23534), 2017-12-20
Supplement: oncotarget-09-5786-s001.pdf [file oncotarget-09-5786-s001.pdf]

# Analysis of the circular RNA transcriptome in endometrial cancer

## SUPPLEMENTARY MATERIALS

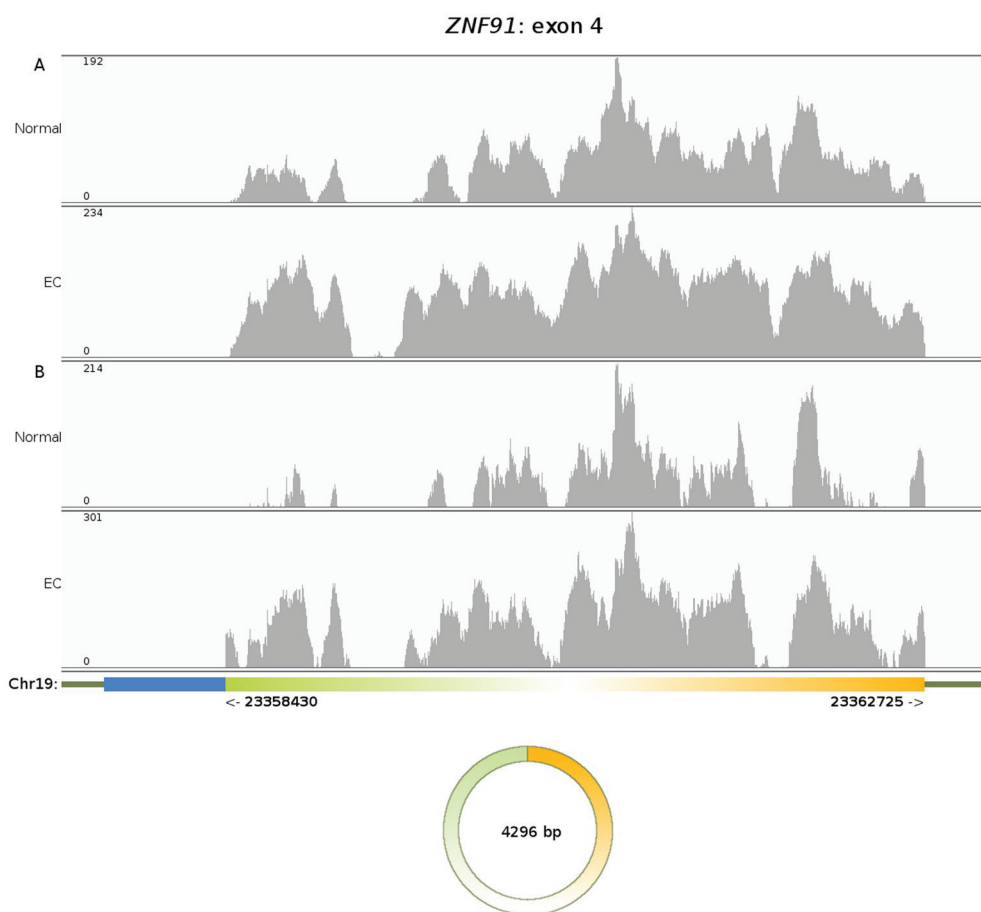

**Supplementary Figure 1:** Schematic presentation of exon expression and structure of Zinc Finger Protein 91 (*ZNF91*) gene for (A) linear and (B) circular transcripts. Peaks within the exon are the reads mapped to the exon. The level of expression is reflected by the height of the read peaks. Below (B), a circular RNA form of *ZNF91* is illustrated as a product of back-splicing.

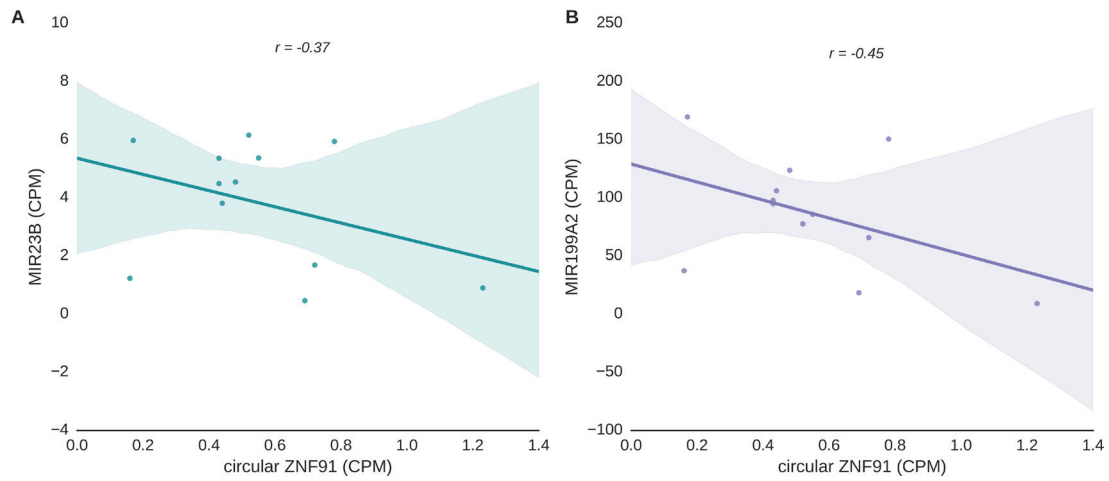

**Supplementary Figure 2:** Pearson's correlation coefficients between circular ZNF91 with (A) miR23B, and (B) miR199A2.

**Supplementary Table 1:** Genes that produced more than ten circRNA isoforms in endometrial cancer and normal tissues, respectively. See Supplementary\_Table\_1

**Supplementary Table 2:** Differentially expressed circular RNAs across endometrial cancer and normal tissues. See Supplementary\_Table\_2
